# Supplementary material
Source: HighWire-hosted journal article supplement (https://cmajopen.ca/highwire/filestream/84939/field_highwire_adjunct_files/2/CMAJOpen-2020-0096-1-at.pdf)
Supplement: CMAJOpen-2020-0096-1-at.pdf [file CMAJOpen-2020-0096-1-at.pdf]

Supplemental Figure 1. Cohort selection flow chart

Supplemental Figure 2. Cumulative incidence of stroke within one year after cardiac surgery.

Supplemental Figure 3. Cumulative incidence of long-term care (LTC) admissions within one year after cardiac surgery.

Supplemental Figure 4. Cumulative incidence of recurrent non-elective hospitalizations ( $\geq 3$  episodes per year) within one year after cardiac surgery.

Supplemental Figure 5. Cumulative incidence of disability, stratified by patient age within one year after cardiac surgery.

Supplemental Figure 6. Cumulative incidence of death, stratified by patient age within one year after cardiac surgery.

Supplemental Figure 7. Cumulative incidence of disability or death, stratified by patient age within one year after cardiac surgery.

Supplemental Table 1. Codes used to identify surgical procedures from the CorHealth Ontario Registry.

Supplemental Table 2a. Cumulative incidence of events within 30 days following cardiac surgery.

Supplemental Table 2b. Cumulative incidence of events within 90 days following cardiac surgery.

**Supplemental Figure 1.** Cohort selection flow chart

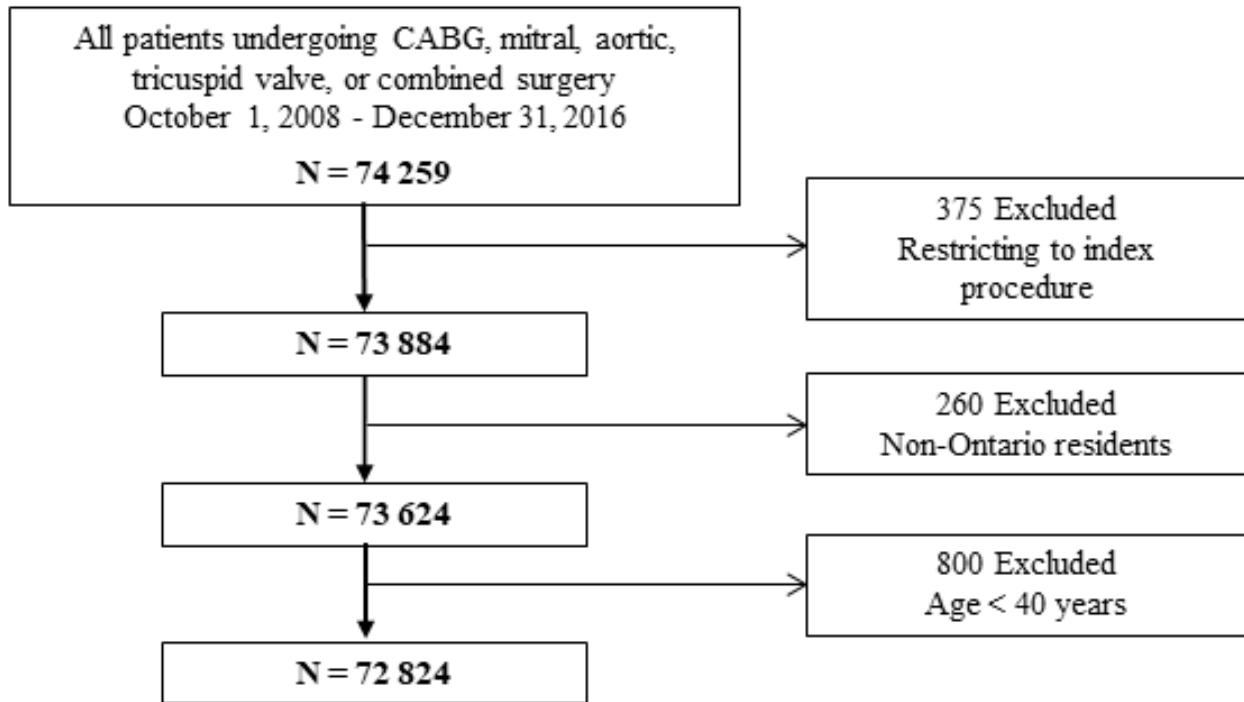

Abbreviation: CABG = coronary artery bypass surgery

**Supplemental Figure 2.** Cumulative incidence of stroke within one year after cardiac surgery.

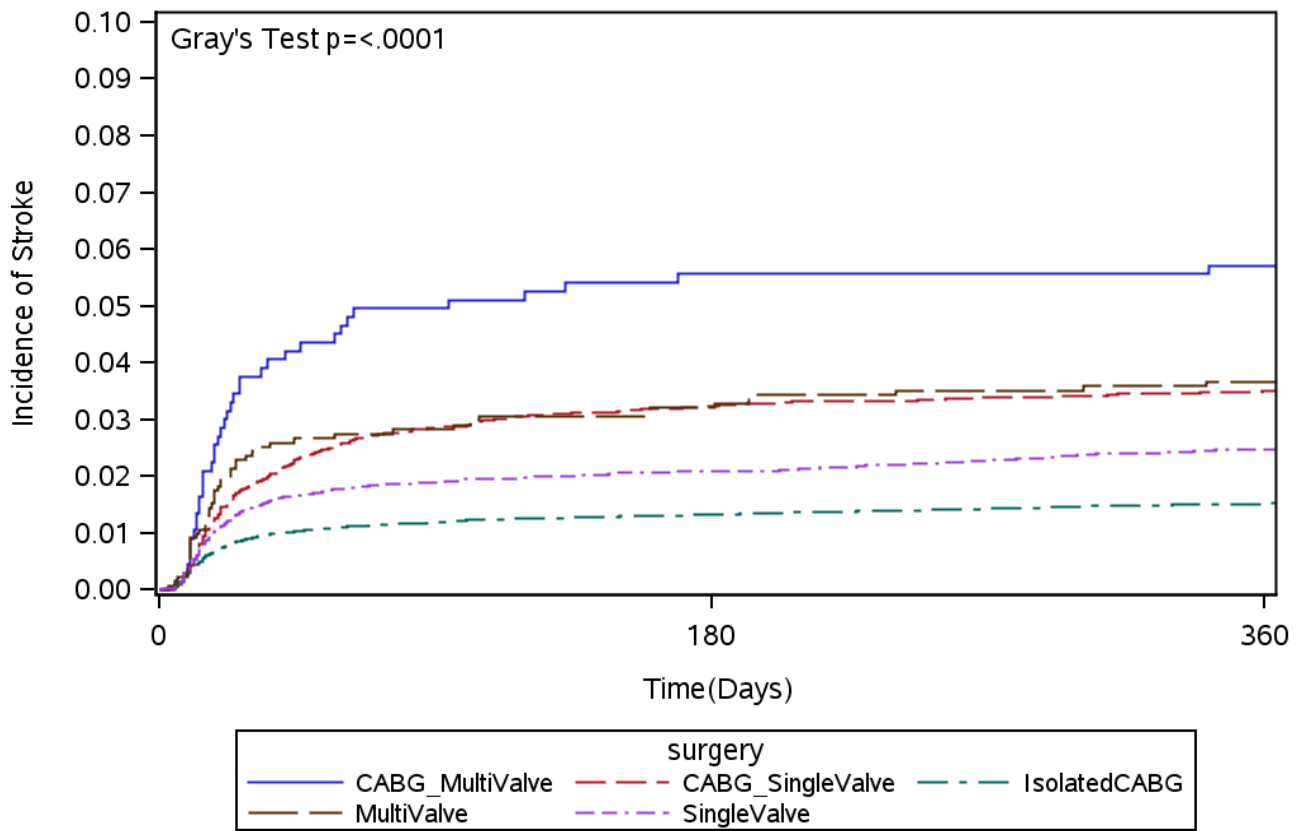



**Supplemental Figure 3.** Cumulative incidence of long-term care (LTC) admissions within one year after cardiac surgery.

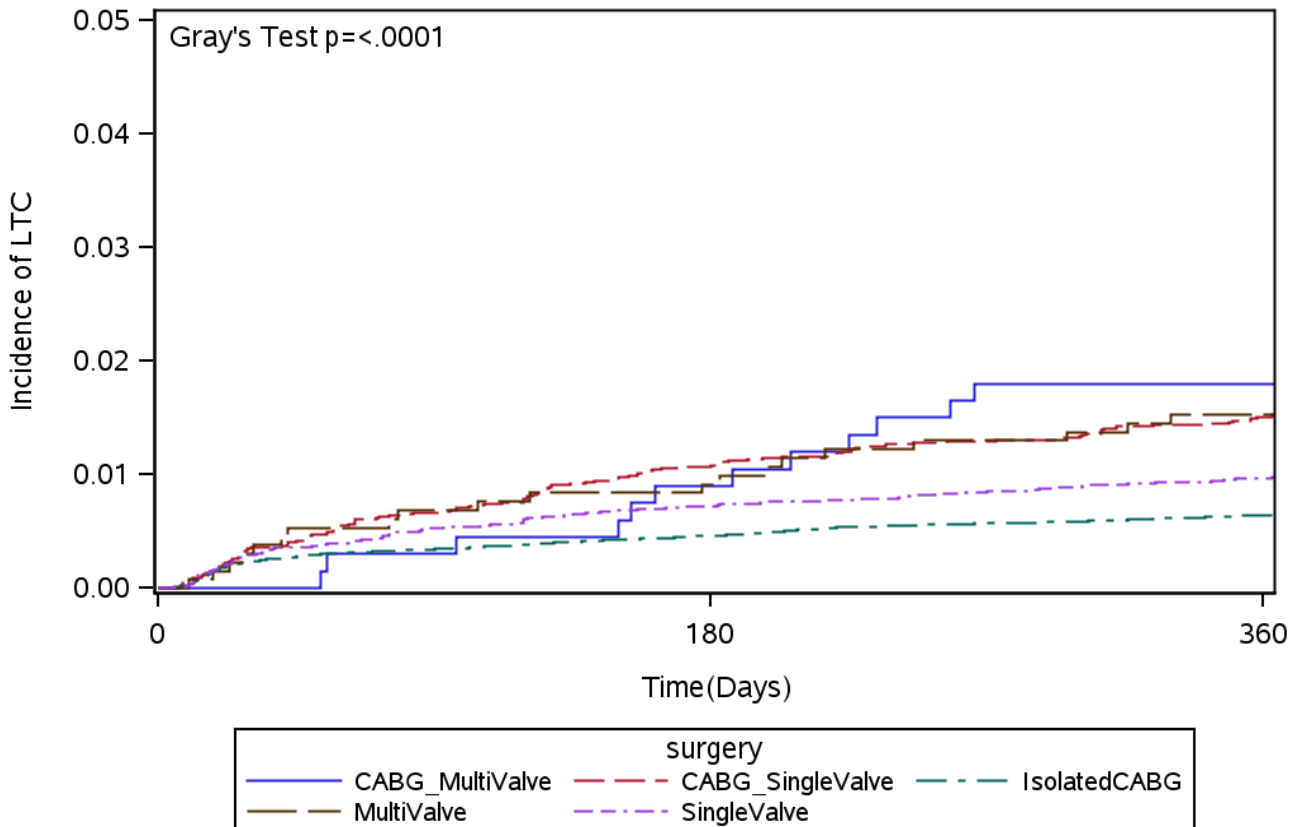



**Supplemental Figure 4.** Cumulative incidence of recurrent non-elective hospitalizations ( $\geq 3$  episodes per year) within one year after cardiac surgery.

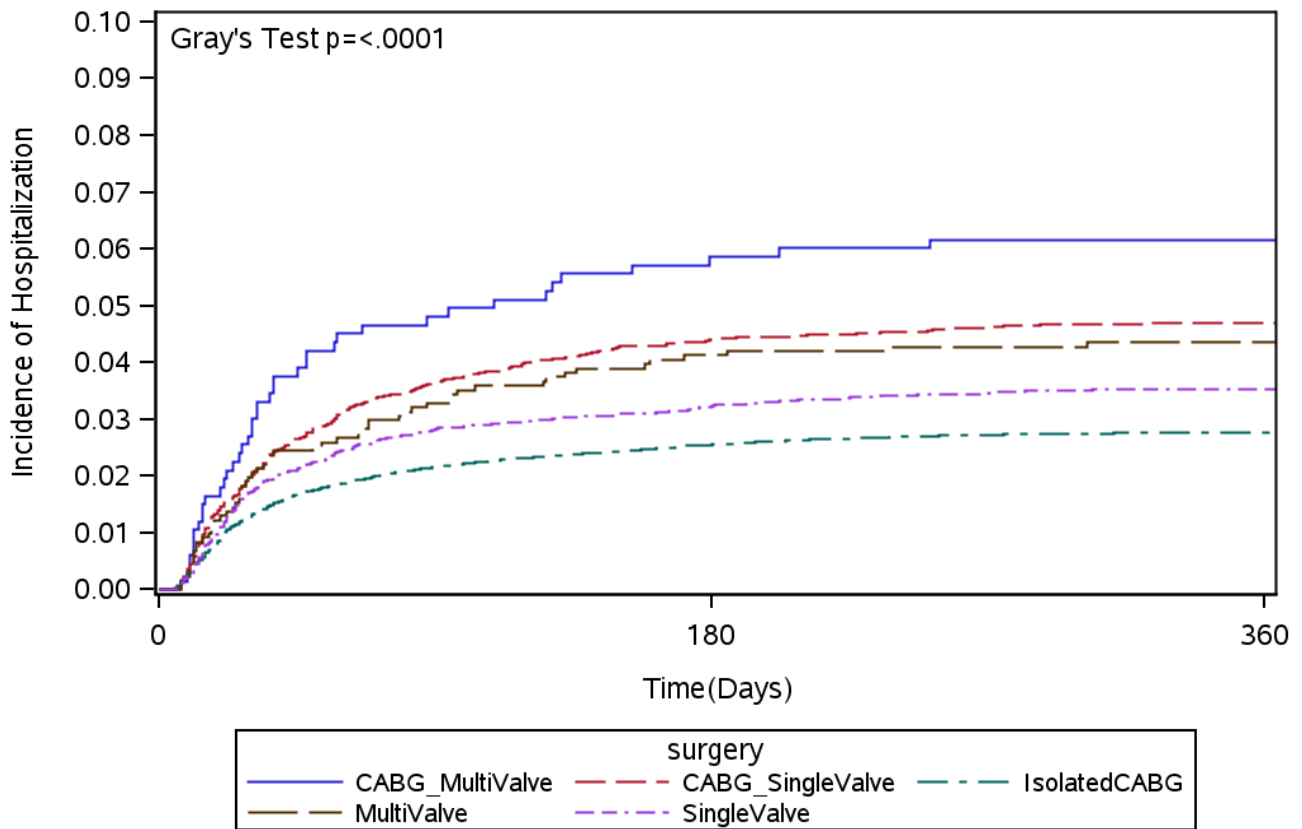

**Supplemental Figure 5.** Cumulative incidence of disability, stratified by patient age within one year after cardiac surgery.

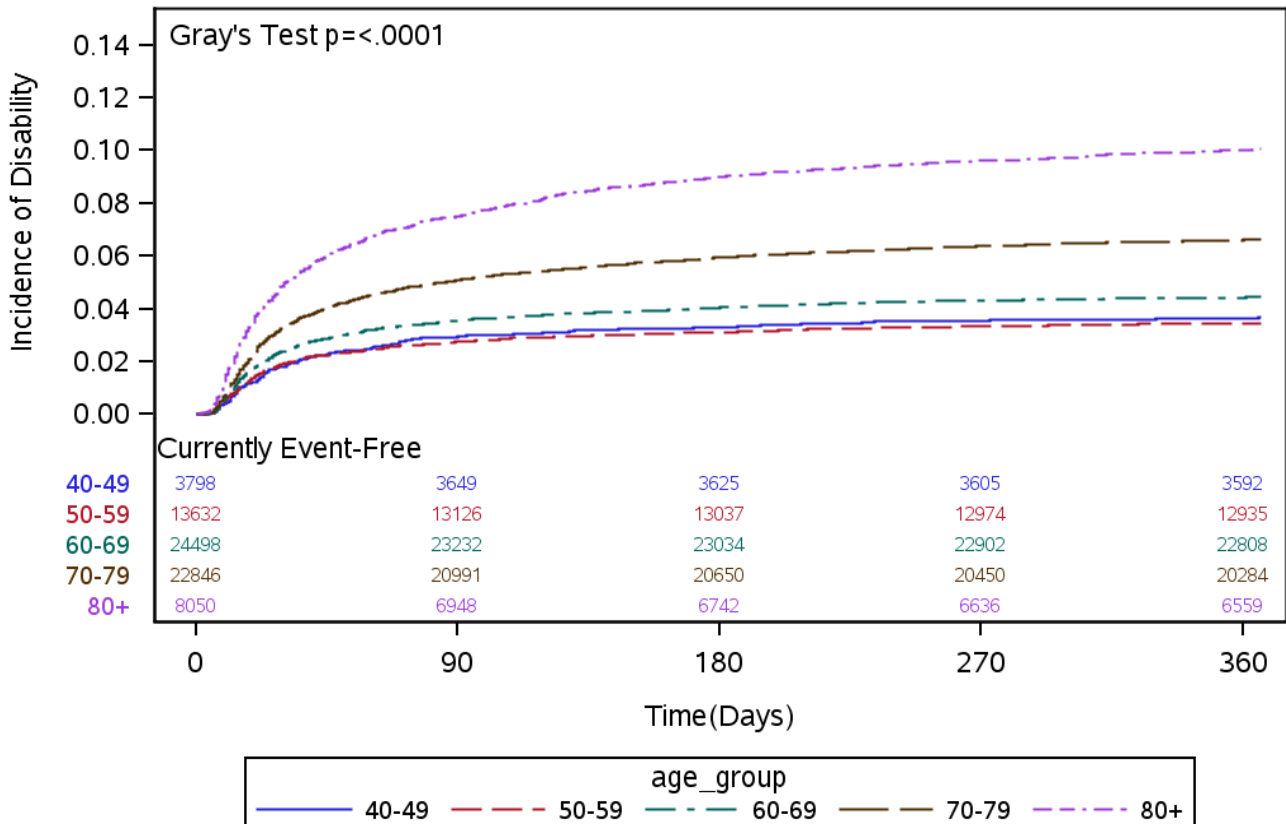



**Supplemental Figure 6.** Cumulative incidence of death, stratified by patient age within one year after cardiac surgery.

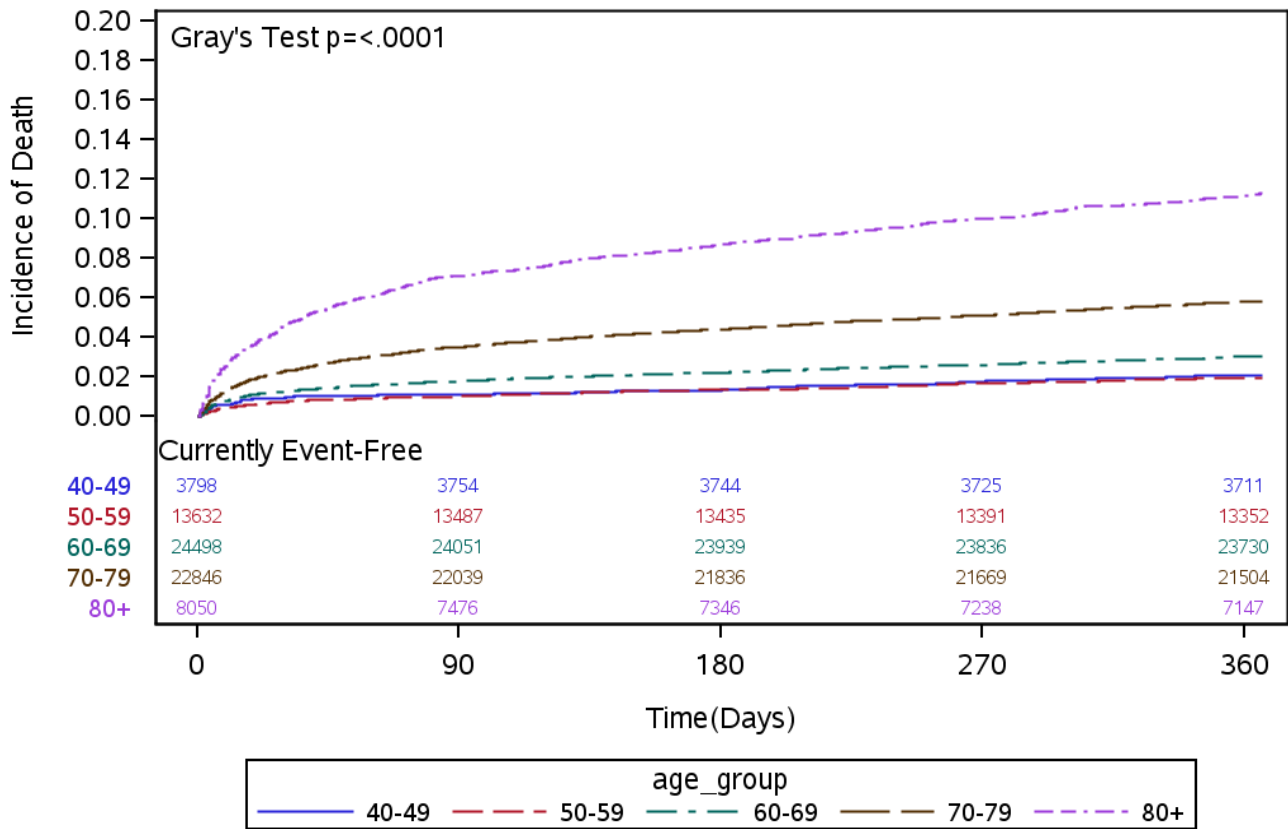

**Supplemental Figure 7.** Cumulative incidence of disability or death, stratified by patient age within one year after cardiac surgery.

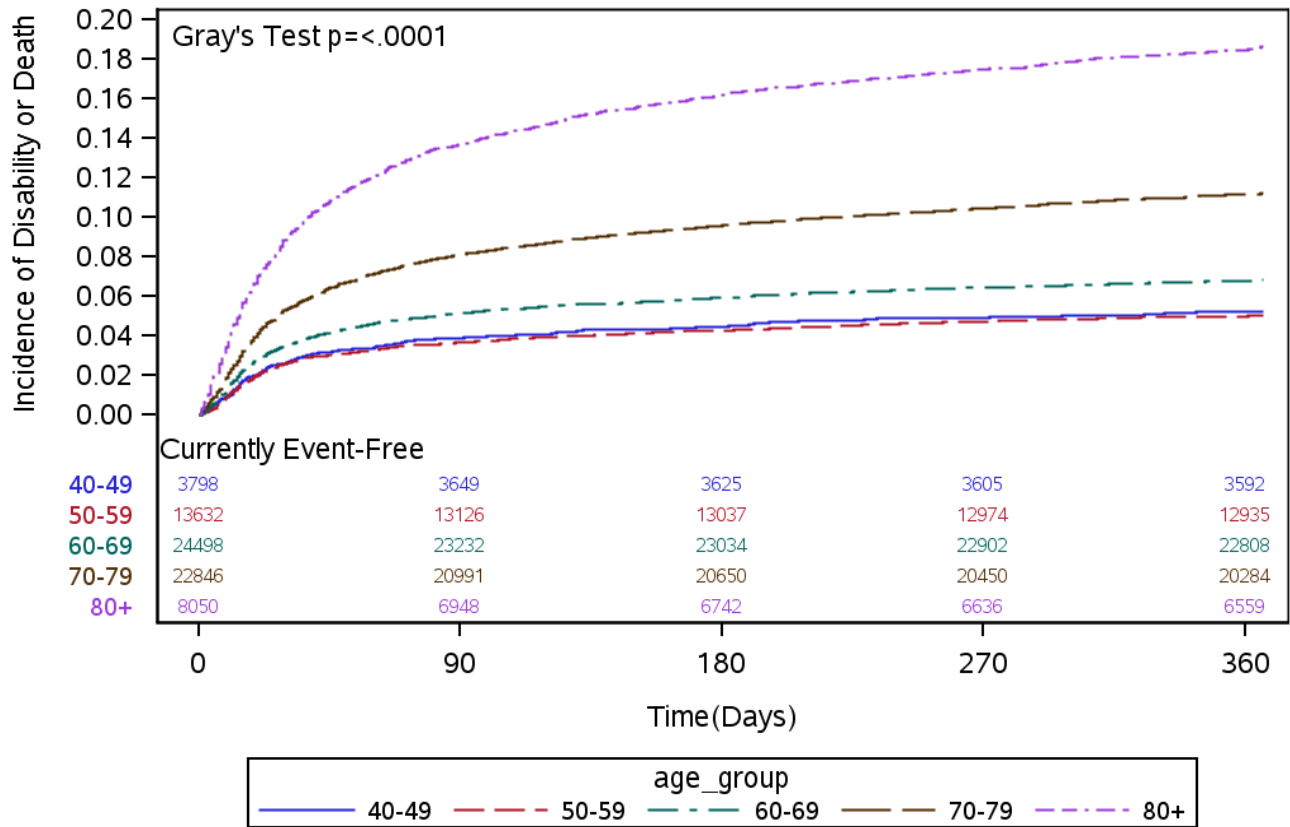

**Supplemental Table 1.** Codes used to identify surgical procedures from the CorHealth Ontario Registry.

| Type of Surgery                 | Code                          |
|---------------------------------|-------------------------------|
| Coronary artery bypass grafting | Surgery_ByPassSurgeryIND      |
| Tricuspid valve surgery         | TricuspidValveSurgeryIND      |
| Mitral valve surgery            | Surgery_MitralValveSurgeryIND |
| Aortic valve surgery            | Surgery_AorticValveSurgeryIND |

**Supplemental Table 2a.** Cumulative incidence of events within 30 days following cardiac surgery.

| Event, % (95% CI)                        | CABG            | Single Valve    | Multiple Valves | CABG +<br>Single Valve | CABG +<br>Multiple Valves |
|------------------------------------------|-----------------|-----------------|-----------------|------------------------|---------------------------|
|                                          | (n=52,546)      | (n=10,368)      | (n=1,309)       | (n=7,936)              | (n=665)                   |
| <b>Disability</b>                        | 1.4 (1.3 - 1.5) | 2.2 (1.9 - 2.4) | 3.4 (2.5 - 4.4) | 3.1 (2.7 - 3.5)        | 5.4 (3.9 - 7.3)           |
| <b>Death</b>                             | 1.4 (1.3 - 1.5) | 1.7 (1.5 - 2.0) | 5.2 (4.1 - 6.5) | 4.0 (3.6 - 4.5)        | 7.5 (5.7 - 9.7)           |
| <b>Disability or death</b>               | 2.7 (2.5 - 2.8) | 3.7 (3.3 - 4)   | 7.7 (6.4 - 9.2) | 6.7 (6.1 - 7.2)        | 11.7 (9.4 - 14.3)         |
| <b>Stroke</b>                            | 1.1 (1.0 - 1.2) | 1.8 (1.6 - 2.1) | 2.8 (2.0 - 3.7) | 2.7 (2.3 - 3.0)        | 5.0 (3.5 - 6.8)           |
| <b>≥ 3 Non-elective hospitalizations</b> | 0.1 (0.0 - 0.1) | 0 (0.0 - 0.1)   | 0.3 (0.1 - 0.8) | 0.1 (0.0 - 0.1)        | 0.5 (0.1 - 1.3)           |
| <b>Long-term care admission</b>          | 0.2 (0.2 - 0.3) | 0.3 (0.2 - 0.4) | 0.3 (0.1 - 0.8) | 0.4 (0.3 - 0.5)        | 0 (0.0 - 0.0)             |

\*\* Comparisons between surgery type yielded  $p < 0.001$  for all variables

Abbreviations: CABG = coronary artery bypass grafting

**Supplemental Table 2b.** Cumulative incidence of events within 90 days following cardiac surgery.

| Event, % (95% CI)                        | CABG            | Single Valve    | Multiple Valves   | CABG +<br>Single Valve | CABG +<br>Multiple Valves |
|------------------------------------------|-----------------|-----------------|-------------------|------------------------|---------------------------|
|                                          | (n=52,546)      | (n=10,368)      | (n=1,309)         | (n=7,936)              | (n=665)                   |
| <b>Disability</b>                        | 2.1 (2.0 - 2.3) | 3.2 (2.9 - 3.6) | 4.4 (3.3 - 5.6)   | 4.3 (3.9 - 4.8)        | 6.8 (5.0 - 8.8)           |
| <b>Death</b>                             | 2.1 (2.0 - 2.2) | 2.6 (2.3 - 2.9) | 7.3 (5.9 - 8.8)   | 6.0 (5.5 - 6.6)        | 10.2 (8.1 - 12.7)         |
| <b>Disability or death</b>               | 3.9 (3.8 - 4.1) | 5.4 (5.0 - 5.9) | 10.5 (9.0 - 12.3) | 9.6 (9.0 - 10.3)       | 15.5 (12.9 - 18.3)        |
| <b>Stroke</b>                            | 1.2 (1.1 - 1.3) | 1.9 (1.7 - 2.2) | 2.9 (2.1 - 3.9)   | 2.9 (2.6 - 3.3)        | 5.1 (3.6 - 7.0)           |
| <b>≥ 3 Non-elective hospitalizations</b> | 0.6 (0.5 - 0.7) | 0.8 (0.6 - 1.0) | 0.8 (0.4 - 1.5)   | 0.8 (0.6 - 1.0)        | 1.5 (0.8 - 2.7)           |
| <b>Long-term care admission</b>          | 0.3 (0.3 - 0.4) | 0.5 (0.4 - 0.7) | 0.7 (0.3 - 1.3)   | 0.7 (0.5 - 0.9)        | 0.3 (0.1 - 1.0)           |

\*\* Comparisons between surgery type yielded  $p < 0.001$  for all variables

Abbreviations: CABG = coronary artery bypass grafting
